# Supplementary material for: Magnetic field-tuned Fermi liquid in a Kondo insulator
Source: Springer Nature journal article supplement (doi:10.1038/s41467-019-13421-w), 2019-12-02
Supplement: 41467_2019_13421_MOESM1_ESM.pdf [file 41467_2019_13421_MOESM1_ESM.pdf]

**Magnetic field-tuned Fermi liquid in a Kondo insulator, Kushwaha *et al.*,  
Supplementary Figures.**

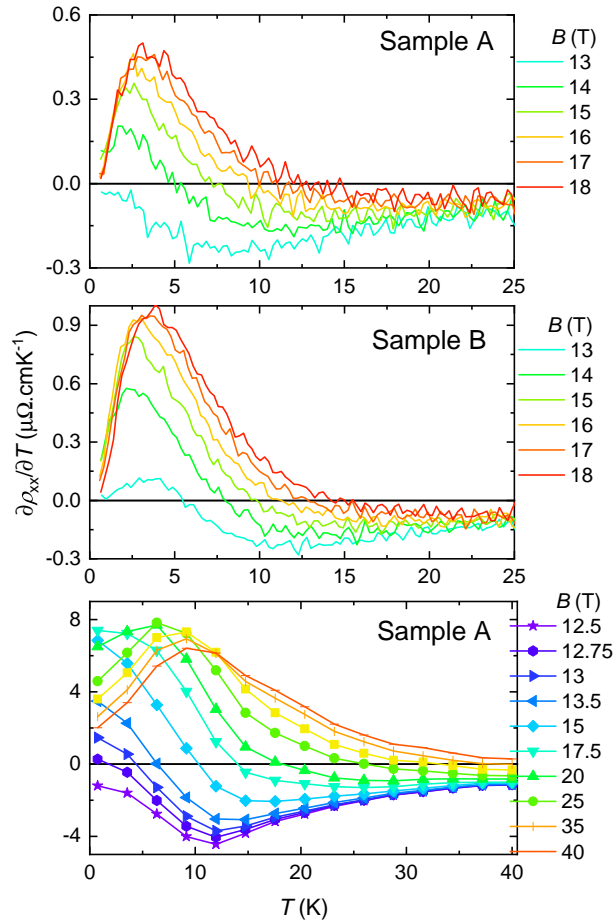

**Supplementary Figure 1: Derivatives of the electrical resistivity of  $\text{Ce}_3\text{Bi}_4\text{Pd}_3$ .** The derivatives  $\partial\rho_{xx}/\partial T$  of the electrical resistivity of  $\text{Ce}_3\text{Bi}_4\text{Pd}_3$  of sample A in static fields, sample B in static fields and sample A in pulsed fields. The actual resistivity data are shown in Fig. 4 of the main manuscript.

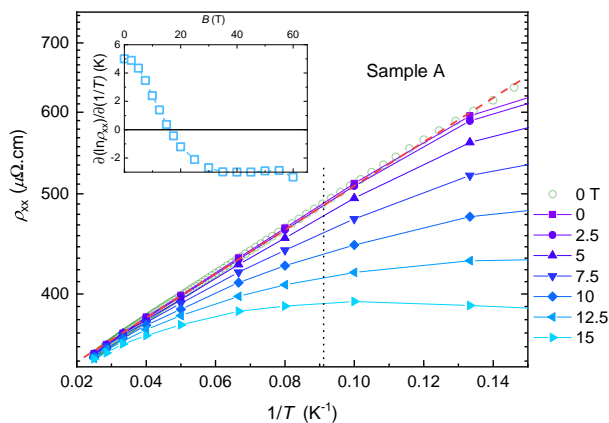

**Supplementary Figure 2: Field-dependent Arrhenius plots of  $\text{Ce}_3\text{Bi}_4\text{Pd}_3$ .** Logarithmically-scaled electrical resistivity of  $\text{Ce}_3\text{Bi}_4\text{Pd}_3$  sample A plotted versus  $1/T$  and different magnetic fields as indicated. The inset shows the slope as a function of magnetic field at 11 K, thus providing electrical transport evidence for the closure of the Kondo gap.

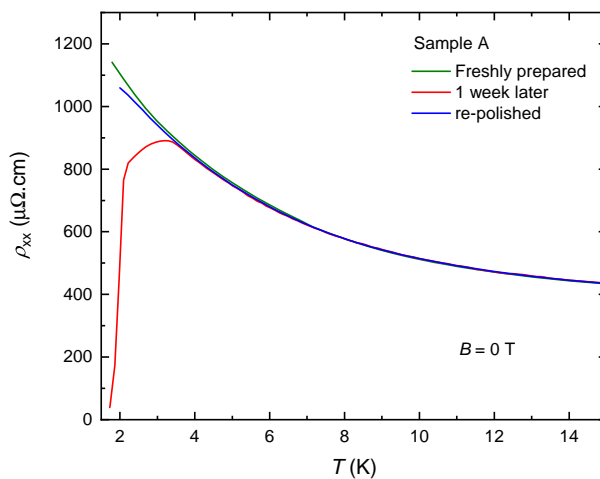

**Supplementary Figure 3: Electrical resistivity of  $\text{Ce}_3\text{Bi}_4\text{Pd}_3$ .** The electrical resistivity of  $\text{Ce}_3\text{Bi}_4\text{Pd}_3$  (sample A), after being freshly prepared (green curve), thermally cycled (red curve) and re-polished to remove surface contamination (blue curve).

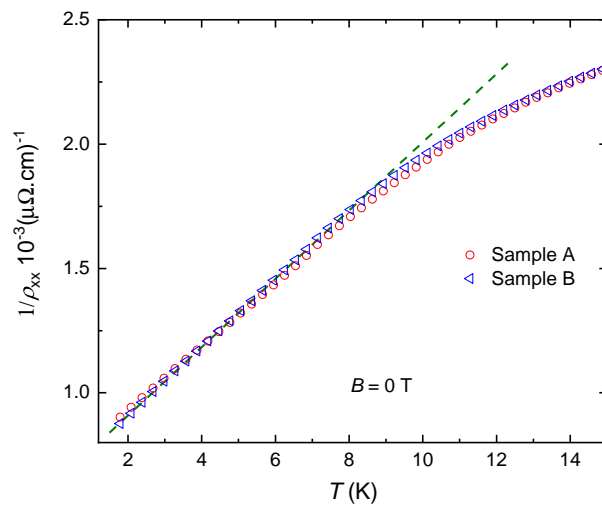

**Supplementary Figure 4: Low temperature reciprocal resistivity of  $\text{Ce}_3\text{Bi}_4\text{Pd}_3$ .** Low temperature reciprocal resistivity of  $\text{Ce}_3\text{Bi}_4\text{Pd}_3$  samples A and B (in difference colors as indicated), indicating a linear-in- $T$  component.

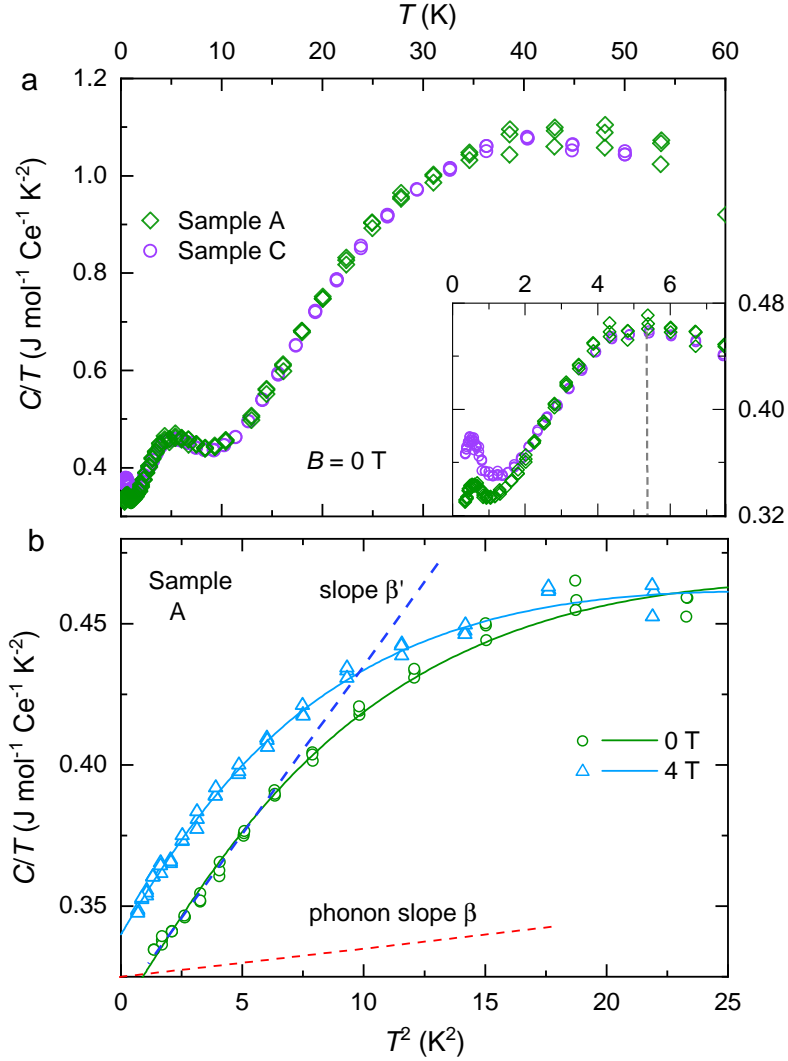

**Supplementary Figure 5: Heat capacity of  $\text{Ce}_3\text{Bi}_4\text{Pd}_3$ .** **a**, Heat capacity divided by temperature  $C/T$  plotted versus  $T$  for two samples A and C (in different colors as indicated). The inset shows an expanded view of the low temperature region. **b**, Low temperature portion of  $C/T$  (from Fig. 6 of the main text) plotted versus  $T^2$  (symbols and colors refer to different fields as indicated, while lines refer to fits to the Schotte-Schotte model), showing an approximate  $T^2$  contribution at low  $T$  on top of that  $\beta T^2$  due to phonons (the assumed phonon contribution is shown in red).

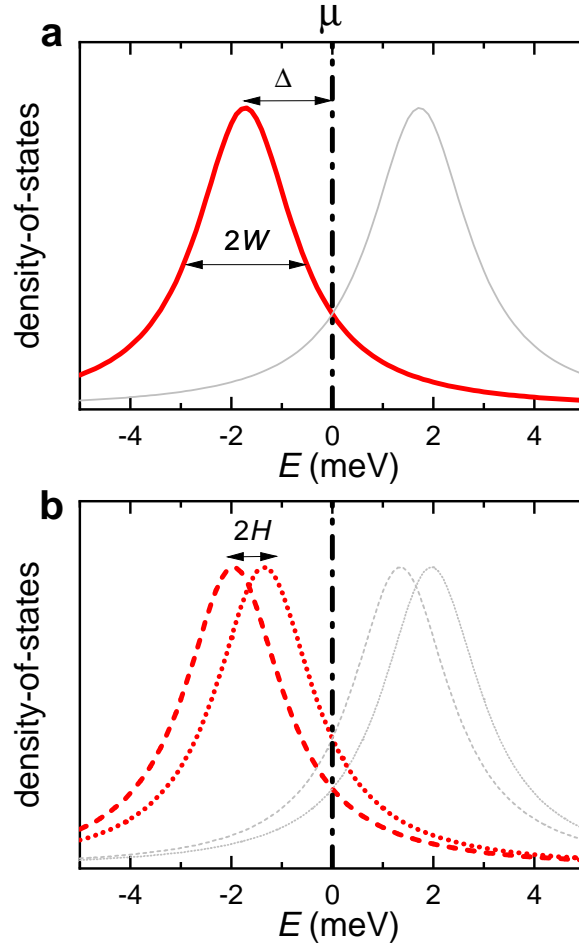

**Supplementary Figure 6: Electronic density-of states according to the Schotte-Schotte model.** **a**, Schematic Lorentzian-shaped electronic density-of-states according to the Schotte-Schotte mode (red thick line).<sup>1</sup> In the fit, we cannot rule out the existence of a similar feature located at positive energies (grey thin line).<sup>2</sup> The vertical black dot-dashed line indicates the location of the chemical potential  $\mu$  at which  $\varepsilon = 0$ . **b**, The same bands (red dashed and dotted curves) split by a Zeeman splitting energy  $2H = g_{\text{eff}}\mu_B B$ .

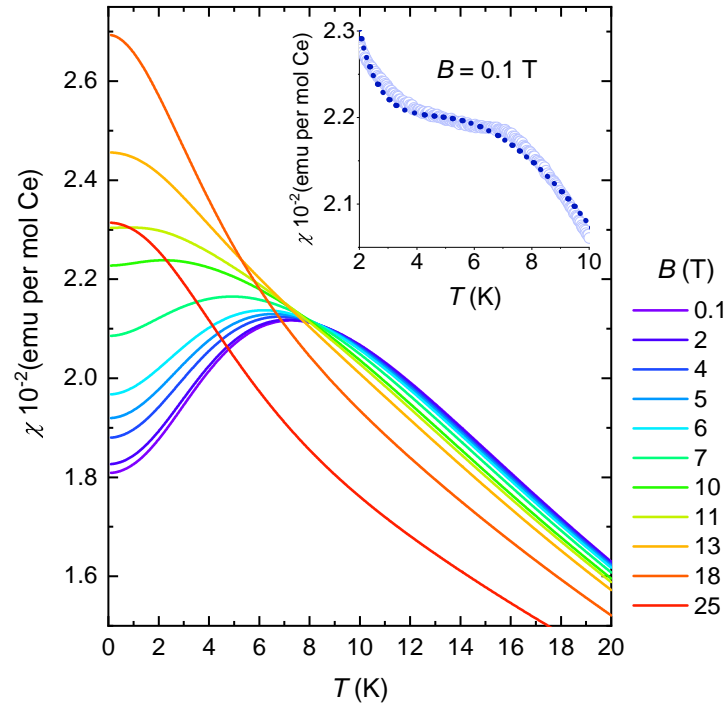

**Supplementary Figure 7: Simulations of the temperature and magnetic field-dependent magnetic susceptibility of  $\text{Ce}_3\text{Bi}_4\text{Pd}_3$ .** Calculated susceptibility according to Equation (3) of the main text, using  $\Delta = 1.5$  meV and  $g_{\text{eff}} = 2.7$ , at different magnetic fields as indicated in different colors. The inset shows a dotted line fit to the experimentally measured susceptibility at 0.1 T including an additional Curie-Weiss term in order to account for the presence of impurities.

## Supplementary References

- [1] Schotte, K. D., Schotte, U., Interpretation of Kondo experiments in a magnetic field. *Phys. Lett.* **55A**, 38-40 (1975).
  
- [2] Tomczak, J. M., Thermoelectricity in correlated narrow-gap semiconductors. *J. Phys.: Condens. Matter* **30**, 183001 (2018).
